# Supplementary material for: Hybrid Polyelectrolyte Nanocomplexes for Non-Viral Gene Delivery with Favorable Efficacy and Safety Profile
Source: MDPI journal article supplement (doi:10.3390/pharmaceutics14071310), 2022-06-21
Supplement: s1 [file s1]

# Supplementary Information

## for

### Hybrid polyelectrolyte nanocomplexes for non-viral gene delivery with favorable efficacy and safety profile

**Gabriele Maiorano<sup>1&</sup>, Clara Guido<sup>1,2&</sup>, Annamaria Russo<sup>1</sup>, Andrea Giglio<sup>1</sup>, Loris Rizzello<sup>3,4</sup>, Mariangela Testini<sup>1</sup>, Barbara Cortese<sup>5</sup>, Stefania D'Amone<sup>1</sup>, Giuseppe Gigli<sup>1,2</sup> and Ilaria E. Palamà<sup>1\*</sup>**

<sup>1</sup> Nanotechnology Institute, CNR-NANOTEC, Monteroni street - 73100 Lecce, Italy; gabriele.maiorano@nanotec.cnr.it (G.M); clara.guido@nanotec.cnr.it (C.G); annamaria.russo@nanotec.cnr.it (A.R); andrea.giglio@nanotec.cnr.it (A.G); mariangela.testini@nanotec.cnr.it (M.T.); stefania.damone@nanotec.cnr.it (S.DA.); ilaria.palama@nanotec.cnr.it (I.E.P.)

<sup>2</sup> Dep. of Mathematics and Physics, University of Salento, Monteroni street - 73100 Lecce, Italy; giuseppe.gigli@unisalento.it (G.G.)

<sup>3</sup> University of Milan, Department of Pharmaceutical Sciences (DISFARM), G. Balzaretti 9 street - 20133 Milan, Italy; loris.rizzello@unimi.it (L.R.)

<sup>4</sup> National Institute of Molecular Genetics (INGM), Francesco Sforza 35 street - 20122 Milan, Italy

<sup>5</sup> Nanotechnology Institute, CNR-NANOTEC, c/o La Sapienza University, P.le A. Moro- 00185 Rome, Italy; barbara.cortese@nanotec.cnr.it (B.C.)

& Contributed equally

\* Correspondence: ilaria.palama@nanotec.cnr.it

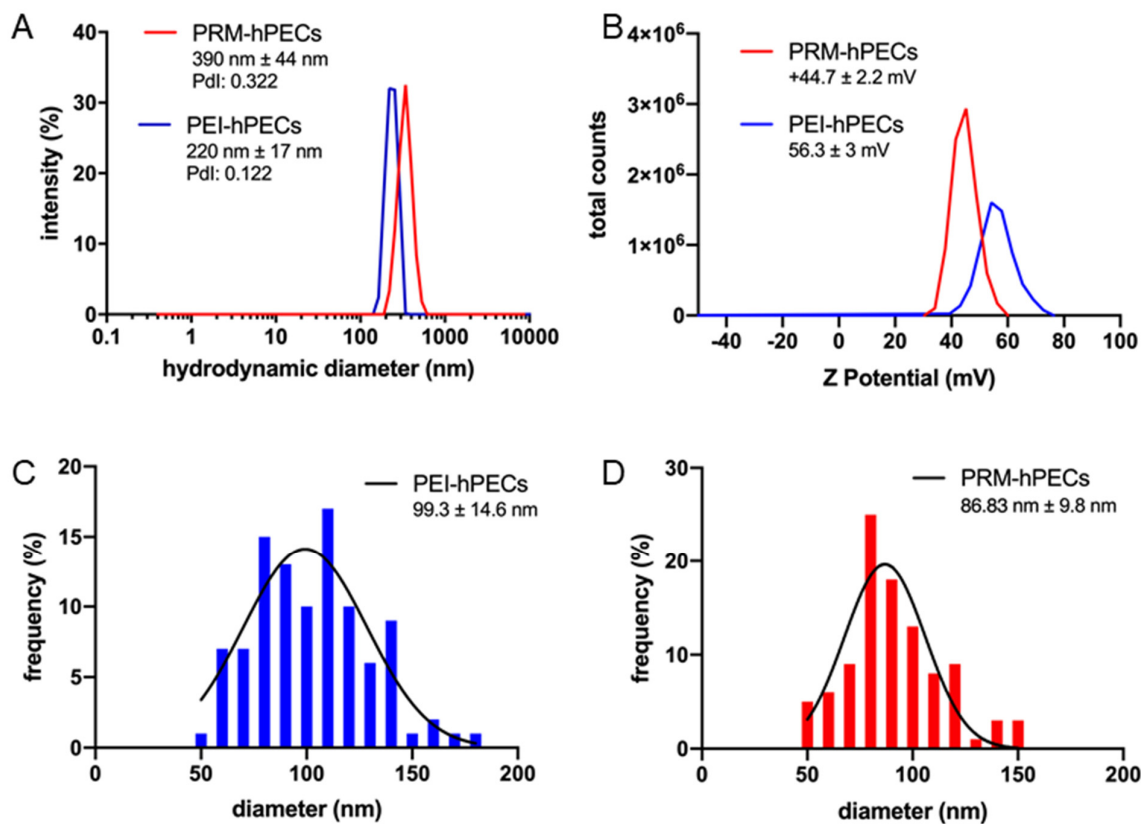

**Figure S1.** (A) DLS analyses of hPECs after dialysis and resuspension in PBS, pH 7.4. Hydrodynamic diameter and polydispersion indexes are reported. (B)  $\zeta$ -potential analyses of the assembled hPECs. (C,D) Size distribution analyses with Gaussian fits of PEI hPECs and PRM-hPECs, respectively, obtained by measuring of at least 100 particles from each AFM image (reported in Figure 1C,D).

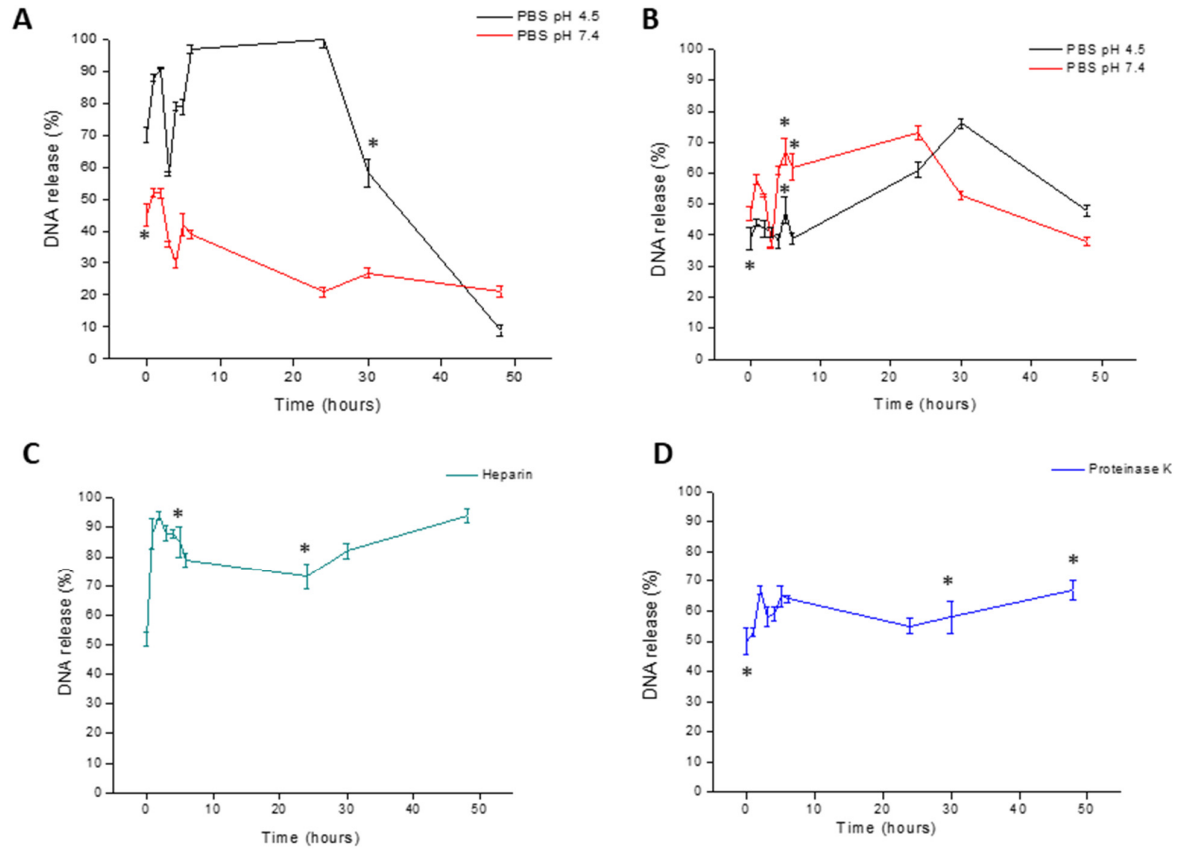

**Figure S2:** DNA release from hPECs under different stimuli for a time window of 48 hours. A) DNA-loaded PRM hPECs incubated at pH 4.5 and 7.4. B) DNA-loaded PEI hPECs incubated at pH 4.5 and pH 7.4. C) DNA-loaded PRM hPECs incubated with proteinase K. D) DNA-loaded PEI hPECs incubated heparin. DNA refers to EGFP plasmid. Representative measurements of three distinct sets of data \* indicates P-values of <0.05 for t-Student test.

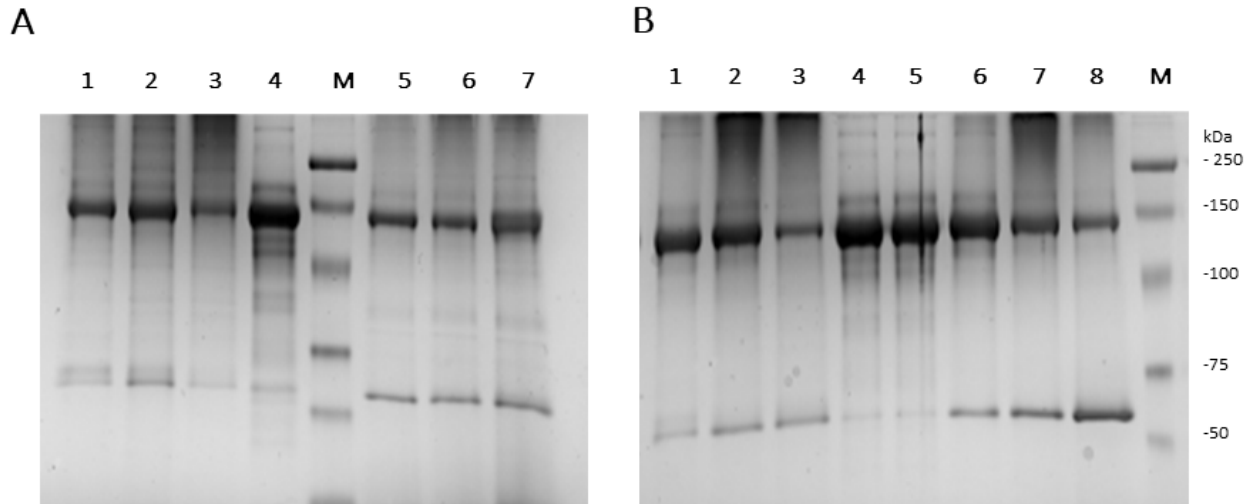

**Figure S3.** In panel A, SDS-PAGE of protein corona obtained from EGFP loaded PRM-hPECs (lanes 1,2,3) and EGFP loaded PEI-hPECs (lanes 5,6,7) after incubation with RPMI at 37 °C for 1 hour (lanes 1,5), 6 hours (lanes 2,6) and 24 hours (lanes 3,7). Lanes 4: only RPMI medium. Lane M: protein marker. In panel B, SDS-PAGE of protein corona obtained from empty PRM-hPECs (lanes 1,2,3) and PEI-hPECs (lanes 6,7,8) after incubation with RPMI at 37 °C for 1 hour (lanes 1,6), 6 hours (lanes 2,7) and 24 hours (lanes 3,8). Lanes 4 and 5: only RPMI medium. Representative images of three independent experiments.

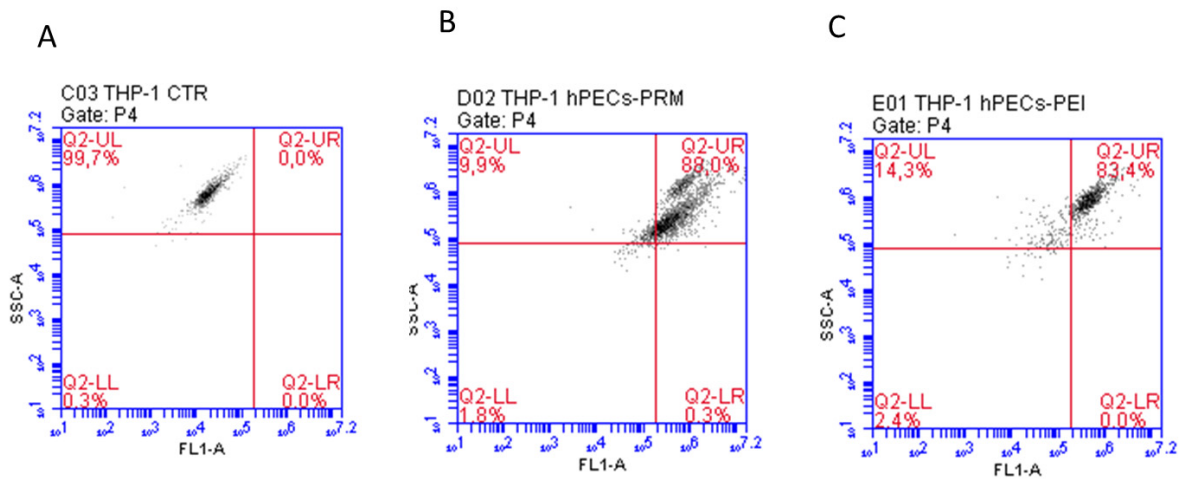

**Figure S4.** Dot plots of cytofluorimetry analysis of CTR (A), and uptake by THP-1 cells of FITC-PRM-hPEC (B) and FITC-PEI-hPECs (C).

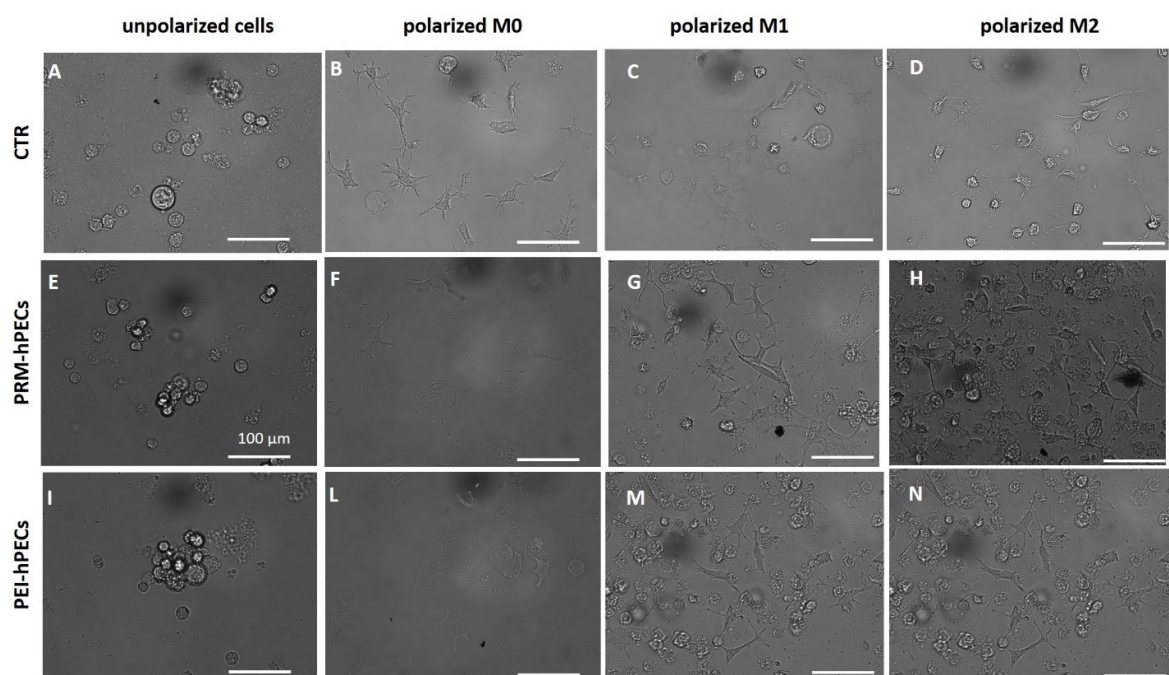

**Figure S5.** Polarization status of the cells (M0- M1 - M2) was assessed by morphological analyses under the microscope after treatment with different cytokines. Scale bars: 75  $\mu$ m

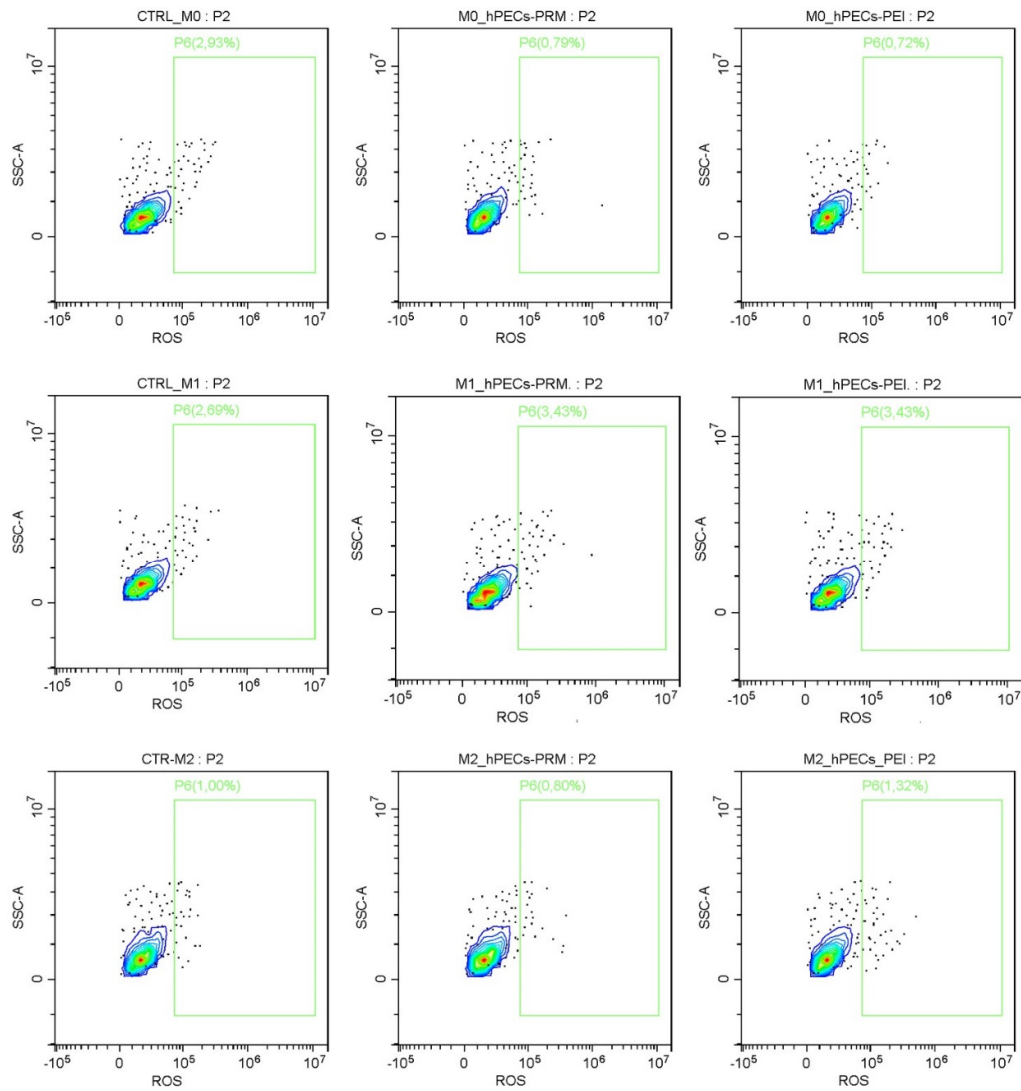

**Figure S6.** Cytofluorimetric analysis of production of ROS on polarized THP-1 cells (M0, M1, M2) after 24 hours of incubation with different hPECs formulations compared with untreated control cells (CTR).

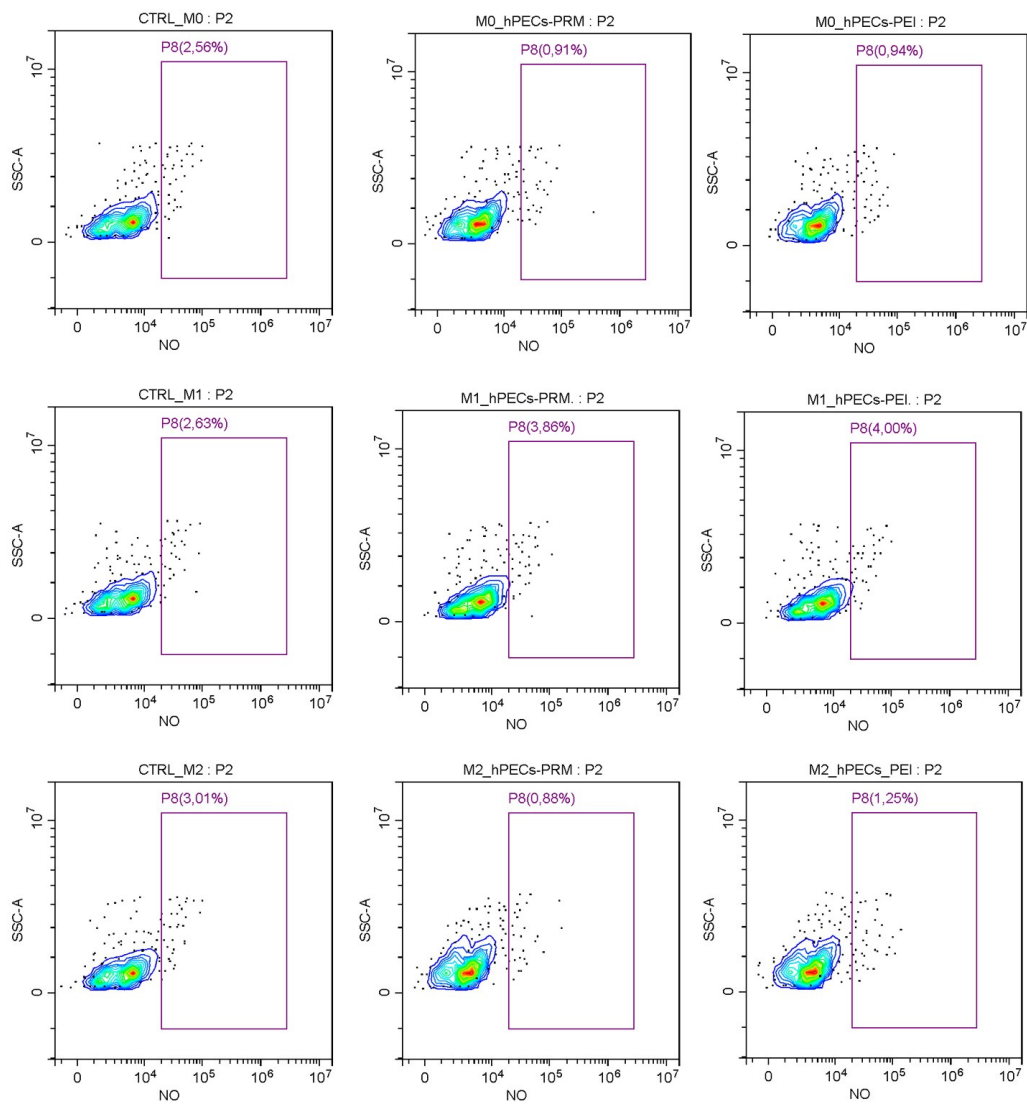

**Figure S7.** Cytofluorimetric analysis of NO production on polarized THP-1 cells (M0, M1, M2) after 24 hours of incubation with different hPECs formulations compared with untreated control cells (CTR).

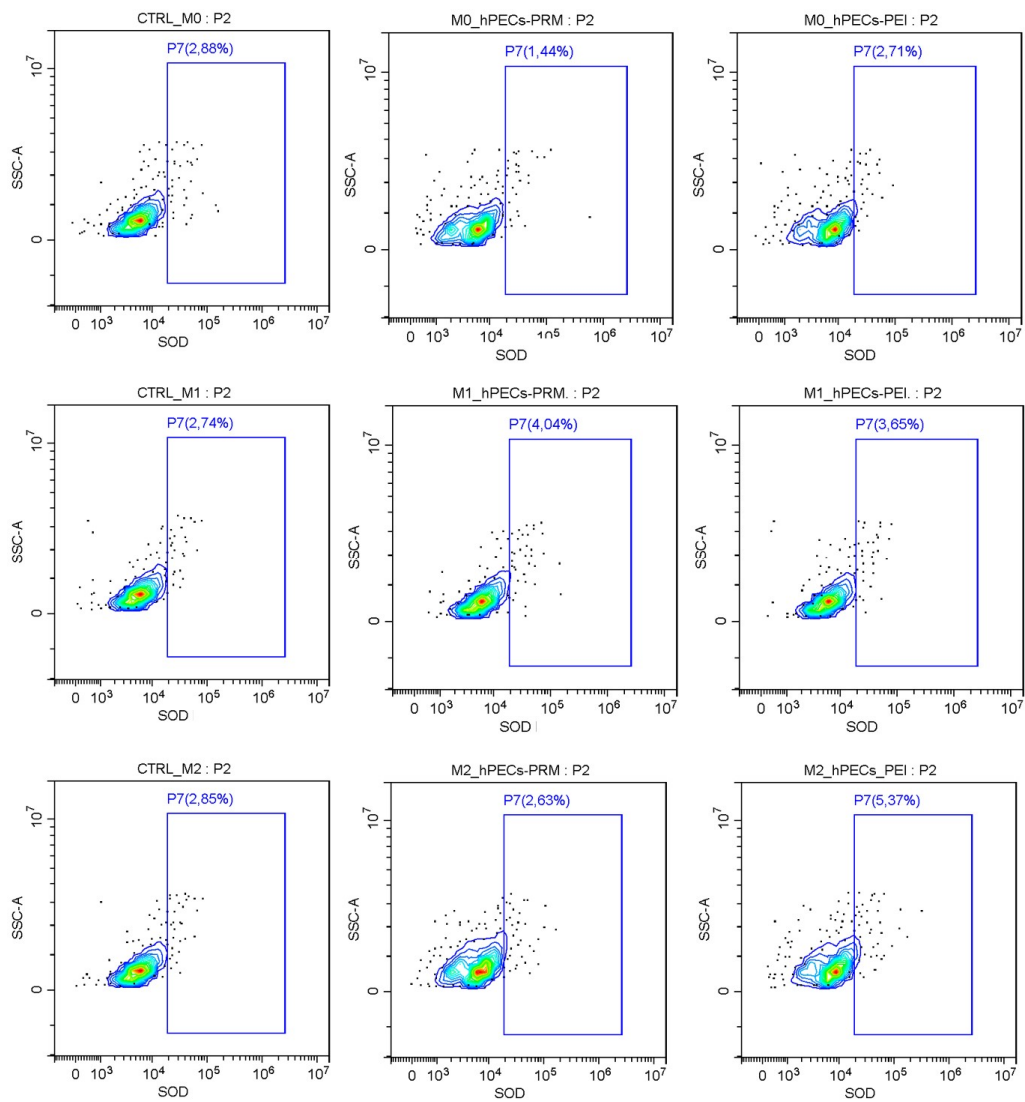

**Figure S8.** Cytofluorimetric analysis of SOD activation inhibition on polarized THP-1 cells (M0, M1, M2) after 24 hours of incubation with different hPECs formulations compared with untreated control cells (CTR).



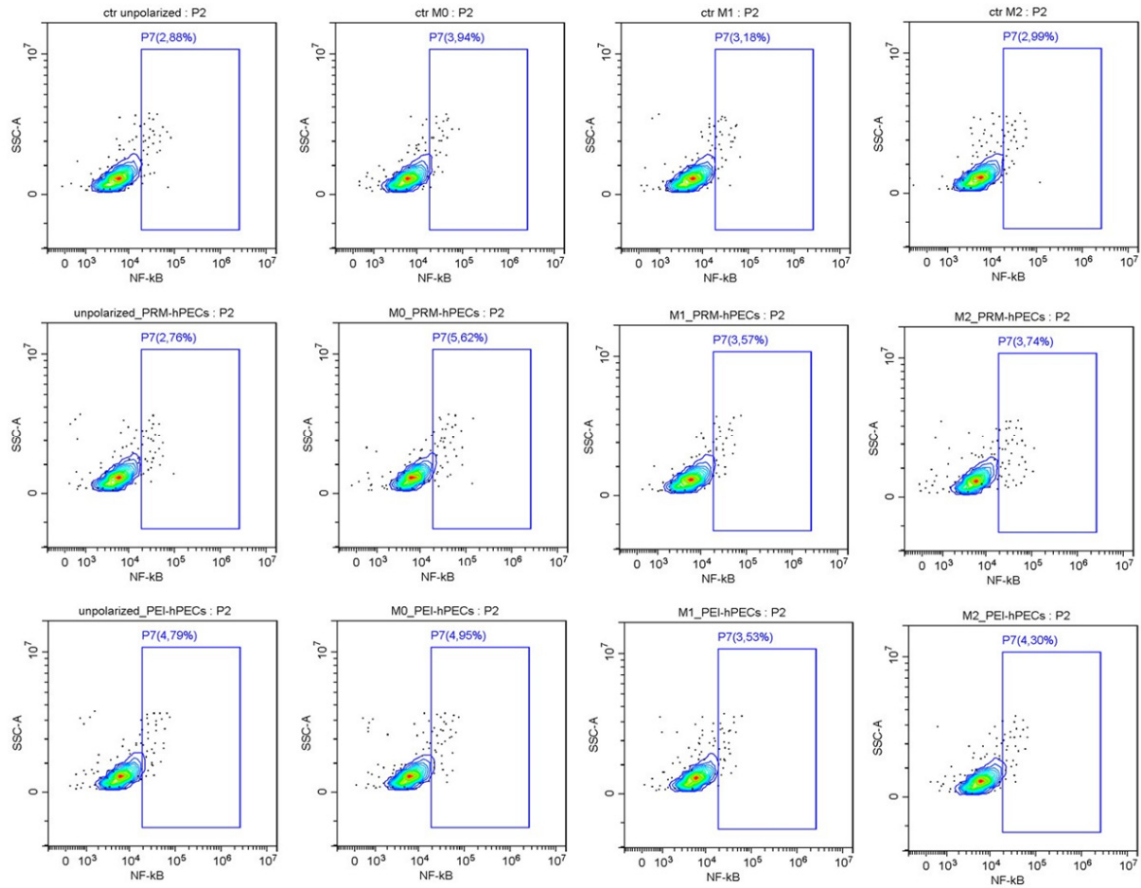

**Figure S9.** Cytofluorimetry analysis of NF- $\kappa$ B expression in unpolarized THP-1 cells and polarized M0, M1, M2 THP-1 cells treated for 48 hours with PRM-hPECs and PEI-hPECs.

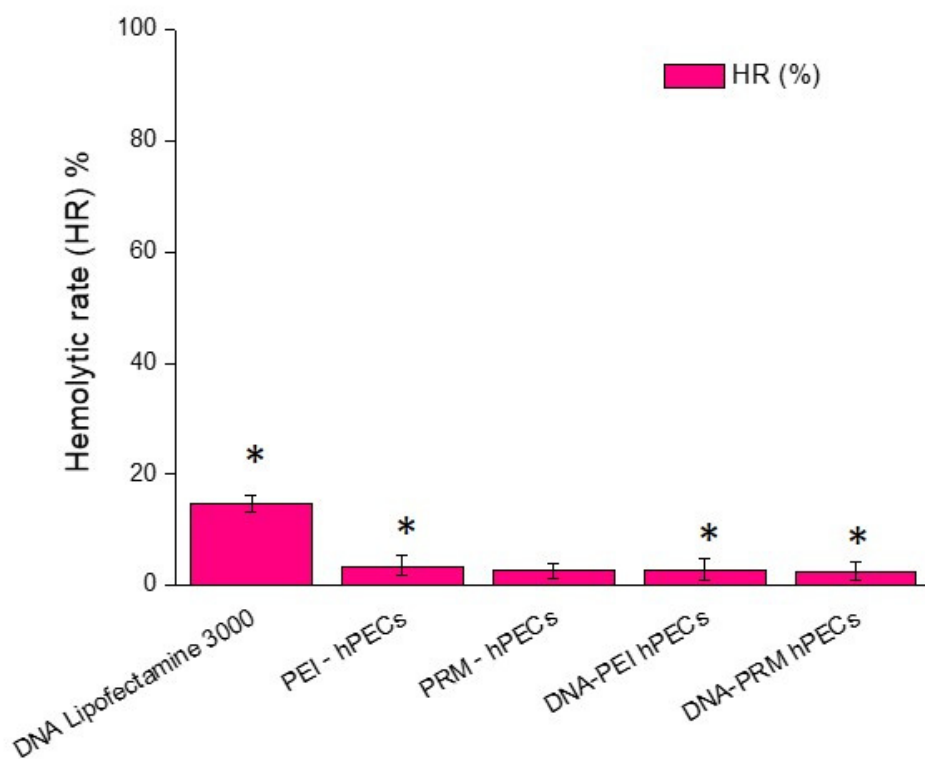

**Figure S10.** Hemolytic assay carried out after 1 hour of incubation at 37°C with DNA-Lipofectamine 3000, empty PEI or PRM hPECs and DNA-PEI, or-PRM hPECs. DNA refers to EGFP plasmid. Representative measurements of three distinct sets of data \* Indicates P-values of <0.05 for t-Student test.
